# Supplementary material for: MicroRNA-532-3p regulates mitochondrial fission through targeting apoptosis repressor with caspase recruitment domain in doxorubicin cardiotoxicity
Source: PubMed Central journal article supplement (PMC4385919; doi:10.1038/cddis.2015.41), 2015-03-12

## Supplemental Figure 1

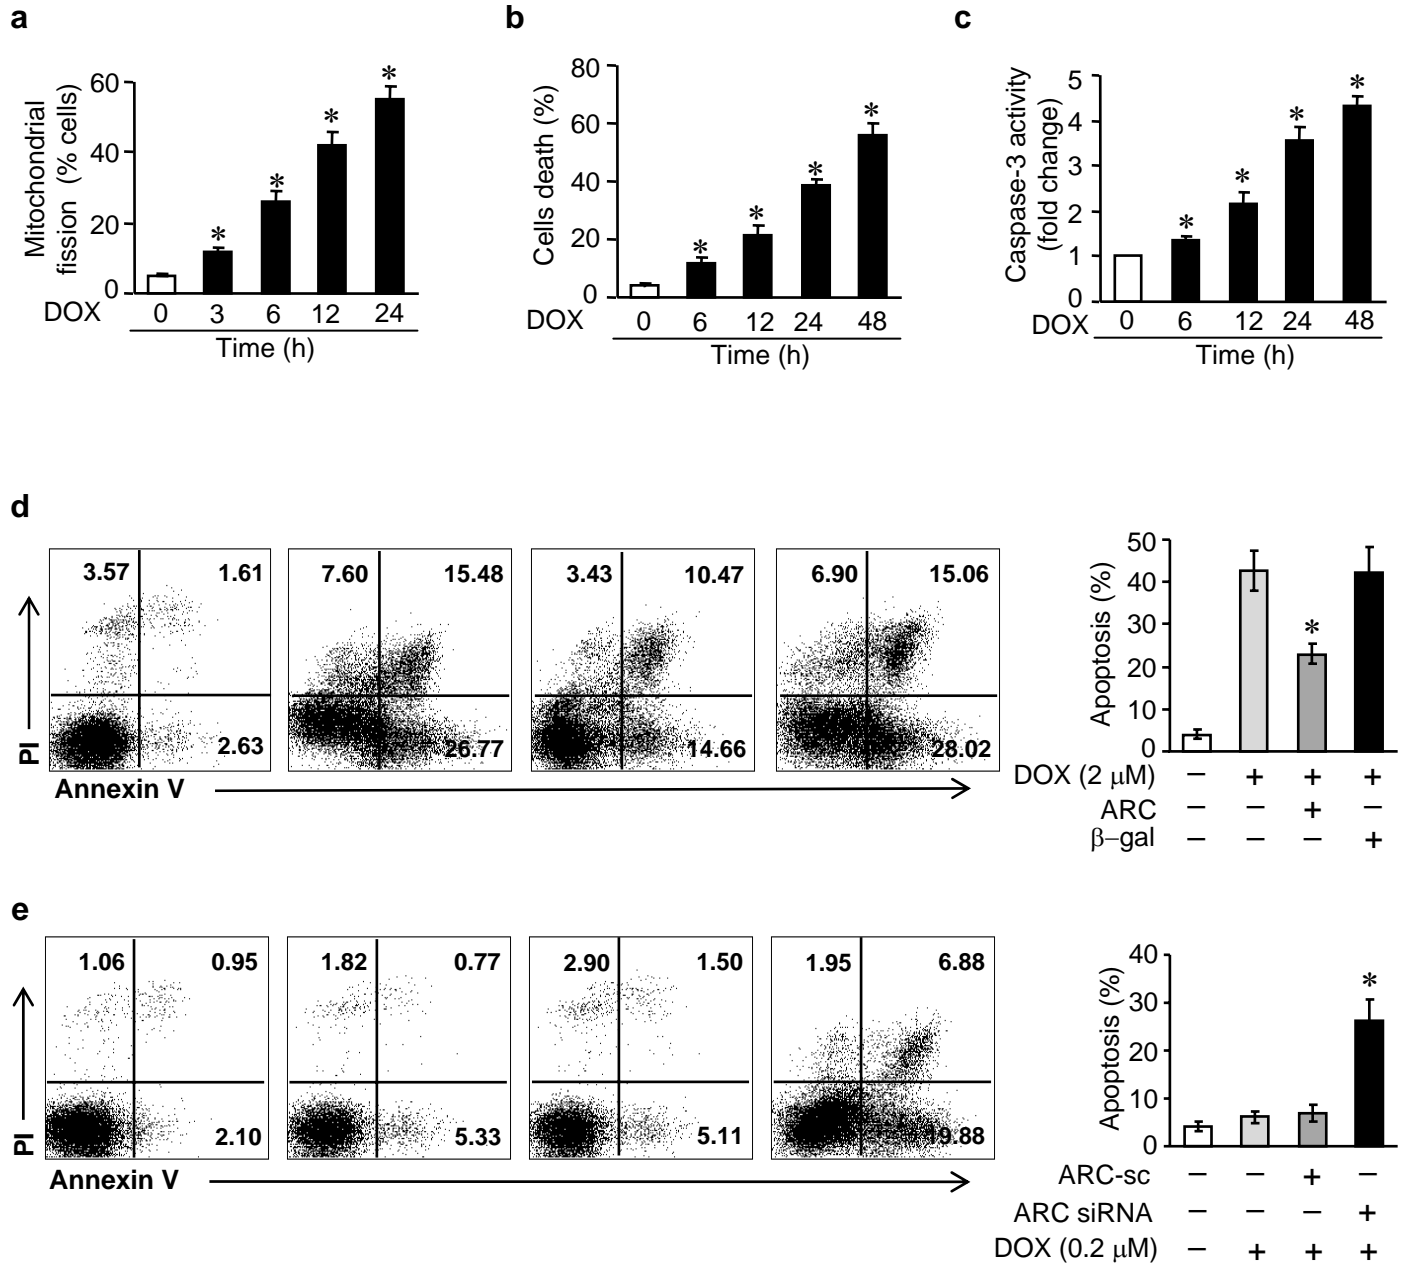

## Supplemental Figure 2

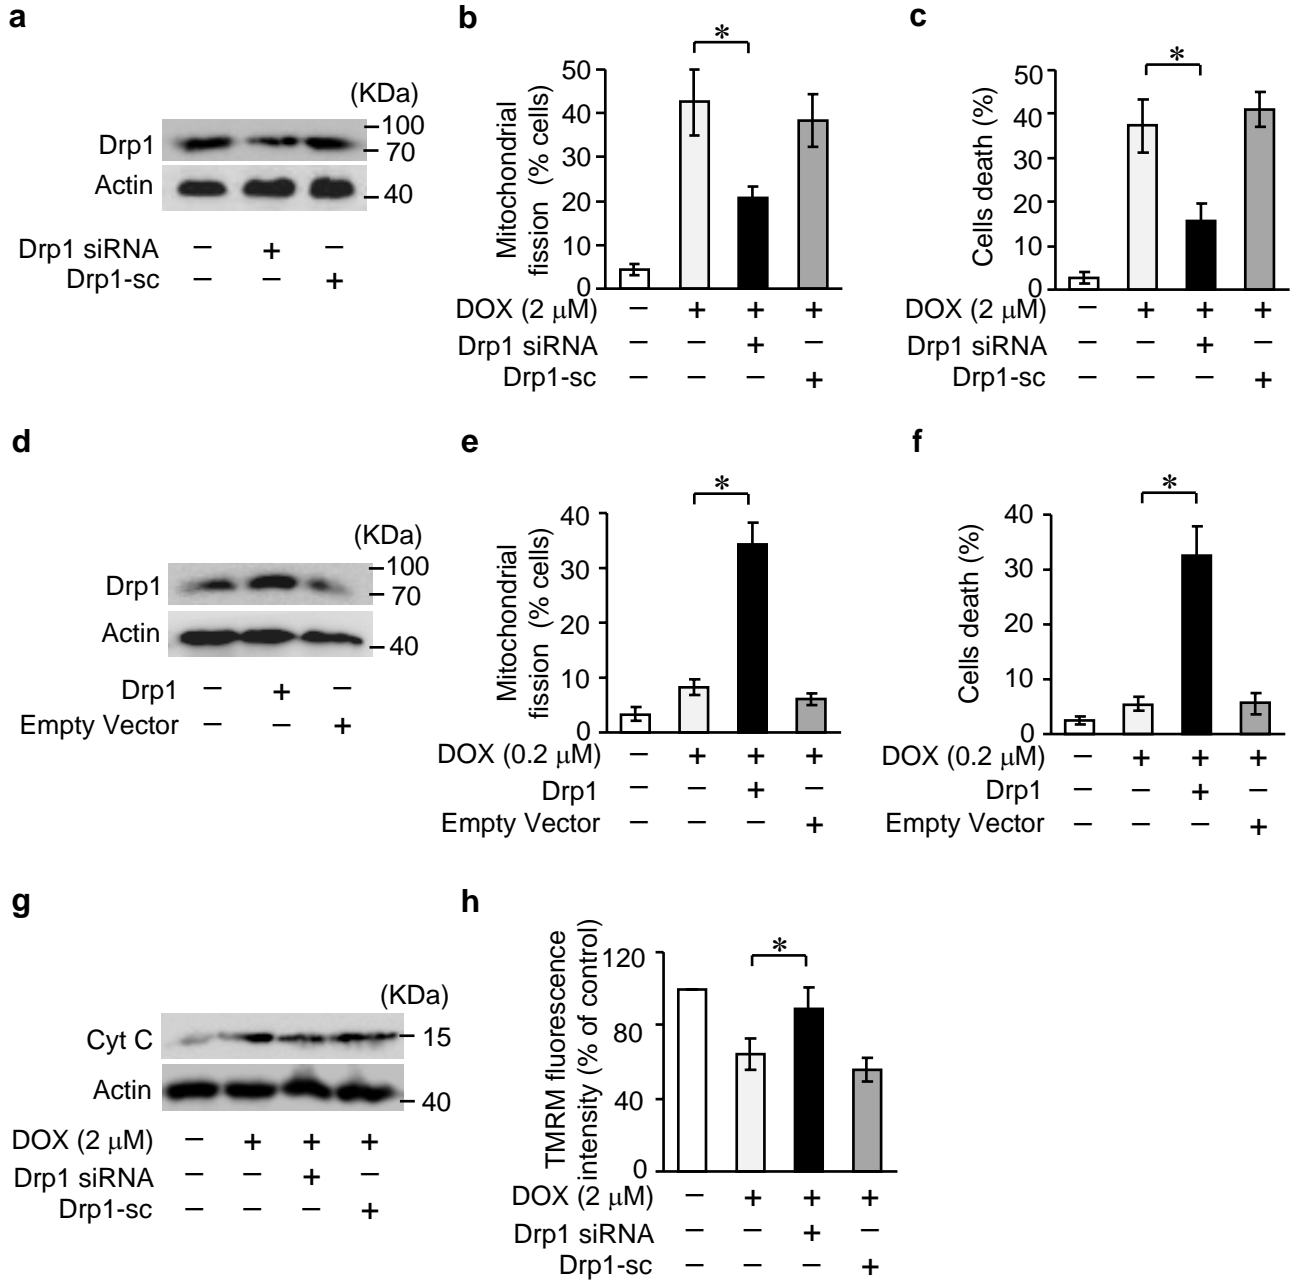

### Supplemental Figure 3

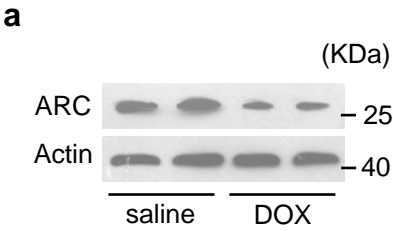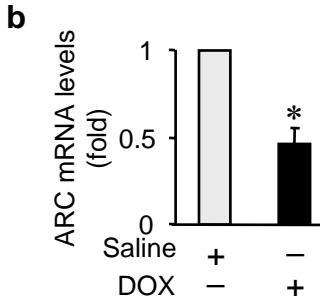

## Supplemental Figure 4

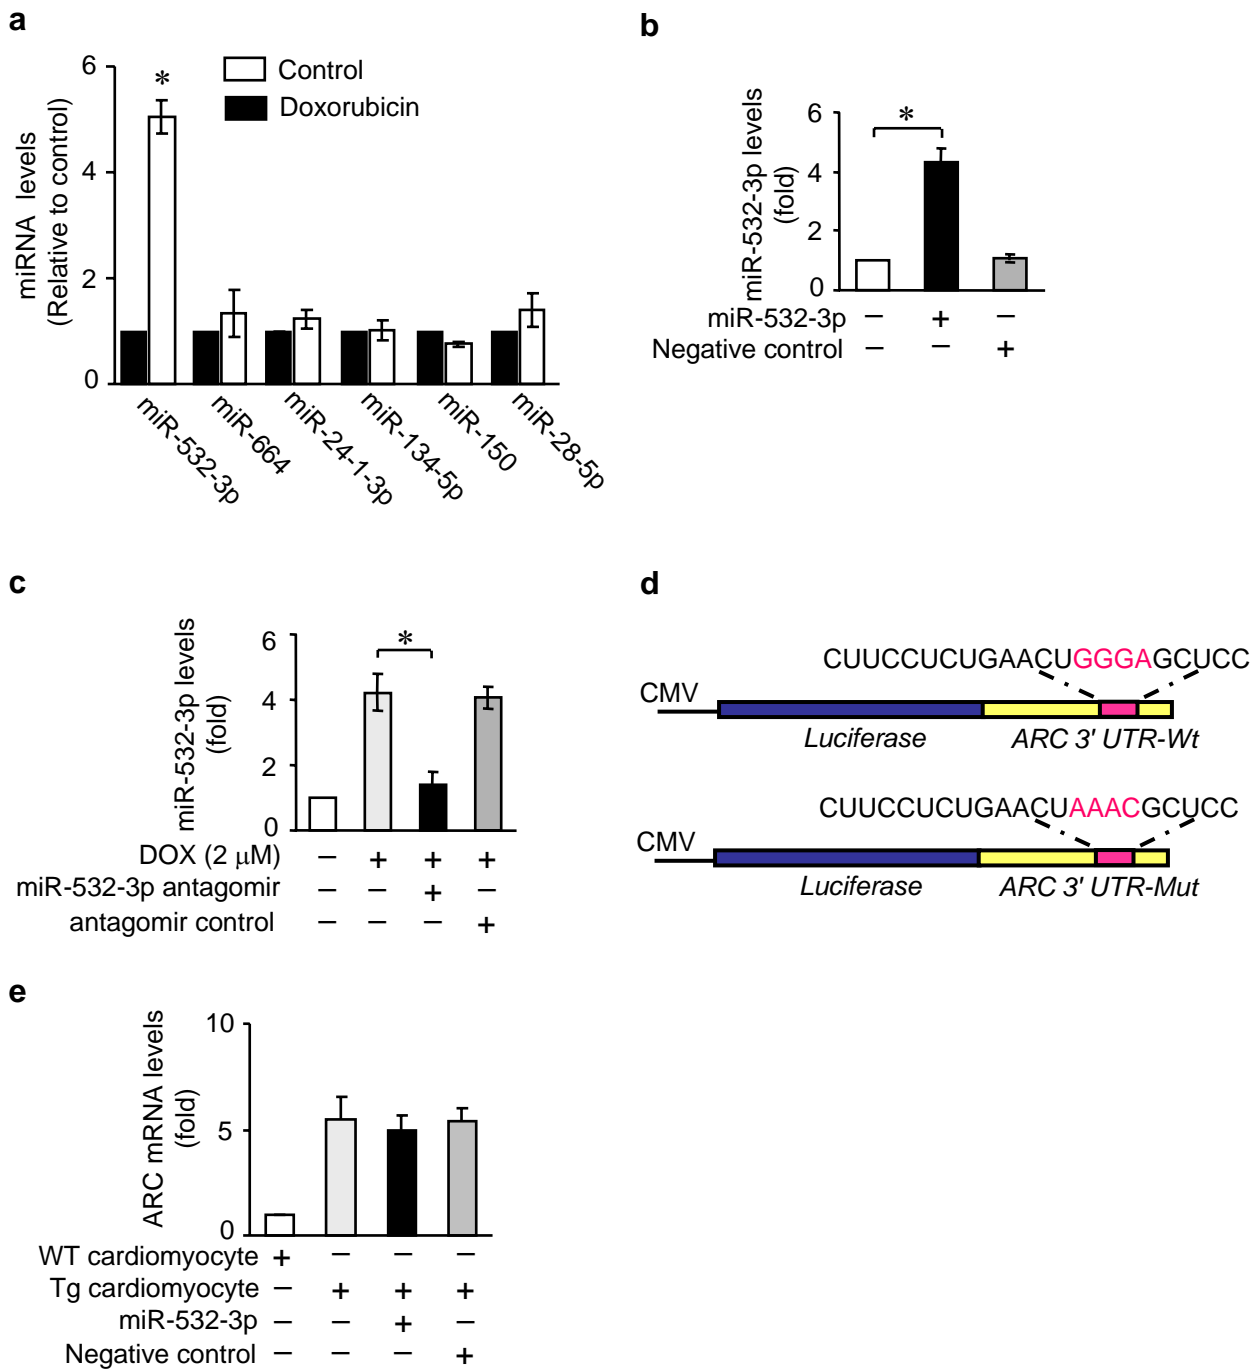

## Supplemental Figure 5

**a**

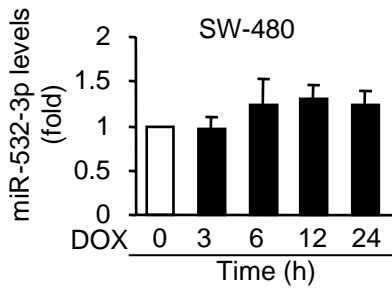

**b**

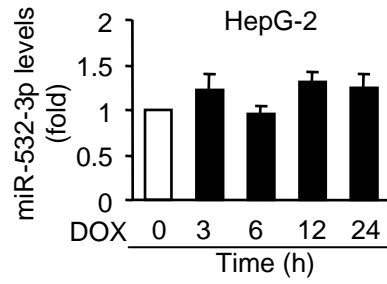

**c**

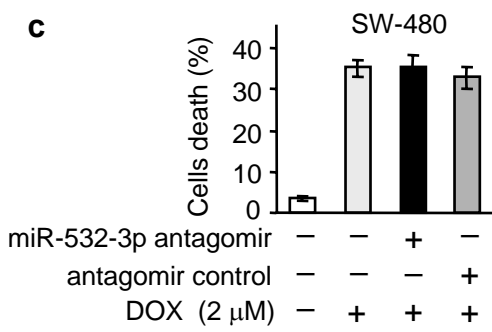

**d**

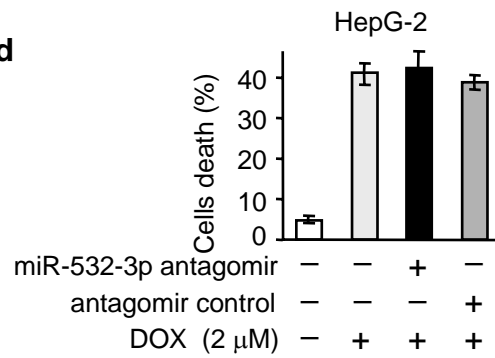

Supplement: cddis201541x2.pdf [file cddis201541x2.pdf]
